# Supplementary material for: Mapping of QTL for Resistance against the Crucifer Specialist Herbivore Pieris brassicae in a New Arabidopsis Inbred Line Population, Da(1)-12×Ei-2
Source: PLoS One. 2007 Jun 27;2(6):e578. doi: 10.1371/journal.pone.0000578 (PMC1892800; doi:10.1371/journal.pone.0000578)
Supplement: Table S1 — Genotype data for Da(1)-12×Ei-2 RILs (0.26 MB XLS) [file pone.0000578.s001.xls]

## Sheet: Lines & Genotypes
Chromosome	1	1	1	1	1	1	1	1	1	1	1	1	1	1	1	2	2	2	2	2	2	2	2	2	2	2	2	3	3	3	3	3	3	3	3	3	3	3	3	3	3	4	4	4	4	4	4	4	4
Marker	C1P12	F20D23_2	MSAT1.7	nga248	F1K23	F1K23.2	MSAT1.4	T27K12	B14	B12	F5I14	MSAT1.12	MSAT1.13	MSAT1.1	MSAT1.2	MSAT2.38	MSAT2.18	MSAT2.28	MSAT2.11	T20K24	F3K23	MSAT2.31	MSAT2.37	C22	MSAT2.4	A21	MSAT2.22	C3P41	3FM08	C3P43	3FM09	3FM10	MSAT3.19	3FM12	MSAT3.8	MSAT3.32	C32	C3P54	C3P58	MSAT3.28	C3P60	T5J8.2	T5J8.1	F4C21	nga8	F28M11	MSAT4.25	F25G13	MSAT4.35
Line
DE001	E	E	.	E	D	D	E	E	E	E	E	D	D	D	D	E	E	D	.	E	E	D	D	D	D	D	E	D	D	D	D	D	E	E	D	E	E	E	E	E	E	D	D	D	D	D	D	D	D
DE002	E	E	E	E	E	E	E	E	E	E	E	D	D	D	D	D	D	D	.	D	D	D	D	E	E	E	E	D	D	D	D	D	D	D	D	D	D	D	E	E	E	D	D	D	D	D	D	D	D
DE003	D	D	D	D	D	D	D	D	D	D	D	D	D	E	E	E	E	E	E	E	E	E	E	E	E	E	E	D	D	D	D	D	D	D	D	D	D	D	D	D	D	D	D	D	D	E	E	E	E
DE004	D	D	D	D	D	D	E	E	E	E	E	E	E	E	E	D	D	D	D	D	D	E	E	E	E	E	E	E	E	E	E	E	E	E	E	E	E	E	E	E	E	D	D	D	D	D	D	D	D
DE005	D	D	D	D	D	D	D	D	E	E	E	E	E	E	E	E	E	E	E	E	E	E	E	E	E	E	E	D	D	D	D	E	.	D	E	D	H	H	H	D	D	D	D	D	D	E	E	E	E
DE006	D	D	D	D	D	D	D	D	D	.	D	E	E	E	E	D	D	D	D	D	D	D	D	D	D	E	E	D	D	D	D	D	D	D	D	D	D	D	D	E	E	E	E	E	E	E	E	E	E
DE007	E	E	E	E	E	E	E	E	E	E	E	E	E	E	E	E	E	E	E	E	E	E	E	E	E	E	D	D	D	D	D	D	D	D	D	D	D	D	D	D	D	D	D	D	D	D	D	D	D
DE008	D	D	D	D	D	D	D	D	D	D	D	D	D	D	E	E	E	E	E	E	E	E	E	E	E	E	E	E	E	E	E	E	E	E	E	E	E	E	E	E	E	D	D	D	E	E	E	E	E
DE009	E	E	E	E	D	D	D	D	E	D	D	D	D	D	D	D	.	D	D	D	D	D	D	D	D	D	D	D	D	D	E	E	E	E	E	E	E	E	E	D	D	D	D	D	D	D	E	E	E
DE011	D	D	D	D	D	D	E	E	E	E	E	E	E	E	E	E	E	E	E	E	E	E	E	E	E	E	E	E	E	E	E	E	E	E	E	E	E	E	E	D	D	E	E	E	E	E	E	E	E
DE012	E	E	E	E	E	E	E	E	E	E	E	E	E	E	E	E	E	E	E	E	E	E	E	D	D	D	D	E	E	E	D	D	D	D	D	D	D	D	D	D	D	D	D	D	D	E	E	E	E
DE013	D	D	D	D	D	D	D	D	D	D	D	D	D	D	E	D	D	D	D	D	D	E	E	E	E	E	E	D	D	D	D	D	D	E	E	E	E	E	E	E	E	E	E	E	E	D	D	D	D
DE014	E	E	E	E	E	E	E	E	E	E	E	E	E	E	E	E	E	E	E	E	E	E	E	E	E	E	E	E	E	E	E	E	D	D	E	E	E	D	D	D	D	D	D	D	D	D	D	D	D
DE015	E	E	E	D	D	D	D	D	D	D	D	D	D	D	D	E	E	E	E	E	E	E	E	E	E	E	E	D	D	D	D	D	D	D	D	D	D	D	.	D	D	D	D	D	D	D	D	D	D
DE016	E	E	E	E	E	E	E	E	E	E	E	E	E	E	E	E	E	E	E	E	D	D	D	D	D	E	E	E	E	E	E	E	E	D	D	D	D	D	D	E	E	E	E	E	E	E	E	E	E
DE017	D	D	D	D	D	D	D	D	D	D	E	E	E	E	E	D	D	D	D	D	D	D	D	D	D	D	E	D	D	D	D	D	D	E	E	E	E	E	E	E	E	E	E	E	E	D	D	D	D
DE018	E	E	D	E	E	E	E	E	E	E	E	E	E	E	E	E	E	E	E	H	H	E	E	E	E	E	E	D	E	E	E	E	E	E	E	E	E	E	E	E	E	E	E	E	E	E	E	E	E
DE019	D	D	D	E	E	E	E	E	E	E	E	E	E	E	E	E	E	E	E	E	E	E	E	E	E	E	E	D	D	D	D	D	E	E	E	E	E	E	E	D	D	D	D	D	D	D	D	D	D
DE020	D	E	E	E	E	E	D	D	E	E	E	E	E	E	E	D	D	D	D	D	E	E	E	E	E	E	E	E	E	E	E	E	E	E	E	E	E	E	E	E	E	E	E	E	E	E	E	E	E
DE021	D	D	D	D	D	D	E	E	E	E	E	E	D	D	D	E	E	E	D	D	D	D	D	D	D	D	D	E	E	E	E	E	E	E	E	E	E	E	E	E	E	E	E	E	E	E	E	E	E
DE022	E	E	E	.	E	E	E	E	E	E	E	E	E	E	E	E	E	E	E	E	E	E	E	E	E	E	E	E	E	E	E	E	E	E	E	E	E	E	D	D	D	E	E	E	D	D	D	D	D
DE023	E	E	E	E	E	E	E	E	E	E	E	H	D	D	D	D	D	D	E	E	E	E	E	E	E	E	E	E	E	E	E	E	E	E	E	E	E	E	E	E	E	E	E	E	E	E	E	E	E
DE024	E	E	D	D	D	D	D	D	E	E	E	E	E	E	E	D	D	D	E	E	E	E	E	E	E	E	E	E	E	E	E	E	E	E	E	E	E	E	E	E	E	E	E	E	E	E	E	E	E
DE025	E	E	E	E	E	E	E	E	E	E	E	D	D	D	D	E	E	E	E	E	E	E	E	E	E	E	E	D	D	D	D	D	E	E	E	E	D	.	D	E	E	D	D	D	D	D	D	D	D
DE026	D	D	D	D	D	D	E	E	E	E	D	D	D	E	E	E	E	E	E	E	E	E	E	E	E	E	E	E	E	E	E	E	E	E	E	E	E	.	D	D	D	D	D	D	D	D	D	D	D
DE027	D	D	D	E	E	E	D	D	D	D	D	E	E	E	E	D	D	D	D	E	E	E	E	D	D	D	D	E	E	E	E	E	E	E	E	E	E	E	D	D	D	E	E	E	D	D	D	D	D
DE028	E	E	E	E	E	E	E	E	E	E	E	E	E	E	E	D	D	D	E	E	E	E	E	E	E	E	E	D	D	D	D	D	D	D	D	D	D	.	D	D	D	D	D	D	D	D	D	D	D
DE029	D	D	D	D	D	D	D	D	D	D	D	D	D	D	D	D	D	D	D	D	D	D	D	D	D	D	D	E	E	E	E	E	E	E	E	E	E	E	E	D	D	D	D	D	D	D	D	D	D
DE030	D	D	D	D	D	D	E	E	E	.	E	E	E	E	E	D	D	D	D	D	D	D	D	D	D	D	E	D	D	D	D	D	D	E	E	E	E	E	E	E	E	.	.	D	D	D	D	D	D
DE031	D	D	D	D	D	D	E	E	E	E	D	D	D	D	D	E	E	D	D	D	D	E	E	E	E	E	E	D	D	D	D	D	D	D	D	D	D	.	D	E	E	E	E	E	E	E	E	E	E
DE032	D	D	D	D	D	D	D	D	D	D	D	D	D	D	D	E	E	E	H	H	H	H	D	D	D	E	E	E	E	E	E	E	D	D	D	D	D	D	D	H	H	D	D	D	D	D	D	D	D
DE033	E	E	D	D	D	D	D	D	D	D	D	D	D	D	D	D	D	D	D	D	D	D	D	D	D	D	D	E	E	E	E	E	E	E	E	E	E	E	E	E	E	E	E	E	E	E	E	E	E
DE034	D	D	D	D	D	D	D	D	D	D	D	D	D	D	D	E	E	D	D	E	E	E	E	E	E	E	E	D	.	D	.	D	D	D	D	D	D	D	D	E	E	E	E	E	E	E	E	E	E
DE035	E	D	D	D	D	D	D	D	D	D	D	D	D	D	E	D	D	D	D	D	D	H	D	D	D	E	E	E	E	D	D	D	D	D	D	D	D	D	D	D	D	E	E	E	E	E	E	E	E
DE036	D	D	D	D	D	D	E	E	E	E	E	E	E	D	D	E	E	E	E	E	E	E	E	E	E	E	D	D	E	E	E	E	E	E	E	E	E	E	E	D	D	E	E	E	E	E	E	E	E
DE037	E	E	E	E	E	E	E	E	E	E	E	E	E	E	D	E	E	E	E	E	E	E	E	E	E	E	E	E	E	E	E	E	E	E	E	E	E	E	E	E	E	D	D	D	E	E	E	E	E
DE038	D	D	D	D	D	D	D	D	D	D	E	E	H	H	H	E	E	E	E	E	E	D	D	D	D	D	D	D	D	E	E	E	E	E	E	E	E	E	E	E	E	E	E	E	E	E	E	E	E
DE039	D	D	D	D	D	D	D	D	D	D	D	D	D	D	D	D	D	D	D	D	D	D	D	D	D	D	D	E	D	D	D	D	E	D	D	D	D	D	D	D	D	E	E	E	E	E	E	E	E
DE040	D	D	D	D	D	D	D	D	E	E	D	D	D	D	D	D	D	D	D	D	D	D	D	D	D	D	D	E	E	E	E	E	E	E	E	E	E	E	E	E	E	D	D	D	D	D	D	D	D
DE041	D	D	D	D	D	D	D	D	E	E	E	E	E	E	E	E	E	E	E	E	E	D	D	D	D	D	D	D	D	D	D	D	D	D	D	D	D	D	E	D	D	E	E	E	E	E	E	E	E
DE042	D	D	D	D	D	D	E	E	E	E	D	D	D	D	D	E	E	E	E	E	E	E	E	E	E	E	E	D	D	D	D	D	D	E	E	E	E	E	E	E	E	E	E	E	E	E	E	E	E
DE043	D	D	D	E	E	E	E	E	E	E	E	E	E	E	E	E	E	E	D	D	D	D	D	D	D	D	E	D	D	D	D	D	D	D	D	D	D	D	D	D	D	D	D	D	D	D	D	D	D
DE044	E	D	E	H	H	H	H	E	D	D	H	E	E	E	E	E	E	E	E	E	E	E	E	E	E	E	E	D	D	D	D	D	D	E	E	E	E	E	E	E	E	D	D	D	D	D	D	D	D
DE045	E	D	D	D	D	D	D	D	D	D	D	D	D	D	D	E	E	.	D	D	D	E	E	E	E	E	E	D	D	D	D	E	E	E	E	E	E	E	E	E	E	D	D	D	D	D	D	D	D
DE046	D	D	D	D	D	D	D	D	D	E	E	E	E	D	D	D	D	D	D	D	D	D	D	D	D	D	D	E	D	D	D	D	D	D	D	D	D	.	E	E	E	E	E	E	D	D	D	D	D
DE047	E	E	E	E	E	E	H	D	D	D	D	D	D	D	D	D	D	D	D	D	D	D	D	D	D	D	D	D	D	D	D	D	D	D	D	D	D	D	D	D	D	E	E	E	E	E	D	E	E
DE048	E	E	E	E	E	E	E	E	E	E	E	E	E	E	E	D	D	D	E	D	D	D	D	D	D	D	D	D	D	D	D	D	D	D	D	D	D	D	.	D	D	E	E	E	E	D	D	D	D
DE049	D	D	D	D	D	D	D	D	D	D	D	D	E	D	D	E	E	E	E	E	E	E	E	E	E	E	D	D	D	D	D	D	D	D	D	D	D	D	D	D	D	D	D	D	D	D	D	D	D
DE050	D	D	D	D	D	D	D	D	D	D	D	D	D	D	D	D	D	D	D	D	D	D	D	H	E	E	E	D	D	D	D	D	D	D	D	D	D	D	D	D	D	D	D	D	E	E	E	E	E
DE051	D	D	D	D	D	D	D	D	D	D	D	D	D	D	D	D	D	D	D	D	D	D	D	D	D	D	E	E	E	E	E	E	E	E	E	E	E	E	D	E	E	D	D	D	D	D	D	D	D
DE052	E	E	E	E	E	E	D	D	D	D	D	D	D	D	D	D	D	D	D	D	D	D	D	H	E	E	E	E	E	E	E	E	E	E	E	E	E	E	E	E	E	D	D	D	D	D	D	D	D
DE053	D	E	E	E	D	D	D	D	D	E	E	E	E	E	E	D	D	D	D	D	D	D	D	D	D	D	D	E	E	E	E	E	E	E	E	E	E	E	E	E	E	E	E	E	E	E	E	E	E
DE054	E	E	E	E	E	E	D	D	D	D	D	D	D	D	D	D	D	D	D	D	E	E	E	E	E	E	E	E	E	E	E	E	E	E	E	E	E	E	E	E	E	E	E	E	E	E	E	E	E
DE055	E	D	D	D	D	D	D	D	D	D	D	D	D	D	D	E	E	E	D	D	D	D	D	D	D	D	D	D	D	D	D	D	D	D	D	D	D	D	D	D	D	E	E	E	E	E	E	E	E
DE056	E	D	D	D	D	D	D	D	D	D	D	D	D	D	E	D	D	D	E	E	E	E	E	E	E	E	E	E	E	E	E	E	E	E	E	E	E	E	E	E	E	D	D	D	D	E	E	E	E
DE057	D	D	E	E	E	E	D	D	D	D	D	E	E	E	E	E	E	E	E	E	E	E	E	D	D	D	E	D	D	D	D	D	D	D	D	D	D	D	D	D	D	E	E	E	E	E	E	D	D
DE058	E	E	E	E	E	E	D	D	D	D	D	E	E	E	E	D	D	D	E	E	E	E	E	E	E	E	E	E	E	E	E	E	D	D	D	D	D	D	D	D	D	E	E	E	E	E	D	D	D
DE059	E	E	E	D	D	D	D	D	D	D	D	D	D	D	D	E	E	E	E	E	E	E	E	E	E	E	E	D	D	D	D	E	E	E	E	E	E	E	E	E	E	D	D	D	D	D	D	D	D
DE060	E	E	D	D	D	D	E	E	D	D	D	D	D	D	D	E	E	E	E	E	E	E	E	E	E	E	E	E	D	D	D	D	D	D	D	D	D	D	D	D	D	E	E	E	D	D	D	D	D
DE061	D	D	D	D	D	D	D	D	D	D	D	E	E	E	E	E	E	E	E	E	E	D	D	D	D	D	D	D	D	D	D	D	D	E	E	E	E	E	E	E	E	D	D	D	D	D	D	D	D
DE062	D	D	D	D	D	D	E	E	E	E	E	E	E	E	D	D	D	D	D	D	D	D	D	D	D	D	D	D	D	D	E	E	E	E	E	E	E	E	E	E	D	E	E	E	D	D	D	D	D
DE063	D	D	D	D	D	D	D	D	E	E	E	E	E	E	E	D	D	D	D	D	D	D	D	D	D	D	D	D	E	E	E	E	E	D	D	D	D	D	D	D	D	D	D	D	D	D	D	D	D
DE064	D	D	D	D	D	D	D	D	D	D	D	D	D	D	D	E	E	E	E	E	E	E	E	E	E	E	E	D	.	D	.	D	D	D	D	D	D	D	D	E	E	E	E	E	E	D	D	D	D
DE065	D	D	D	D	D	D	E	E	E	E	E	E	E	E	D	D	D	D	D	D	D	D	D	D	D	D	D	D	H	H	E	E	E	E	E	E	E	E	.	D	D	E	E	E	E	E	D	D	D
DE066	D	D	D	D	D	D	D	D	D	D	D	D	D	D	D	D	D	D	D	D	H	H	D	D	D	D	D	E	E	E	E	E	E	D	D	D	D	D	D	D	D	D	D	D	D	D	D	D	D
DE067	E	E	E	D	D	D	D	D	D	D	D	D	D	D	D	E	E	E	E	E	E	E	E	E	E	E	E	E	E	E	E	E	E	E	E	E	E	E	D	H	D	D	D	D	E	D	D	D	D
DE068	D	D	D	D	D	D	D	D	D	D	D	D	D	D	D	D	D	D	D	D	D	D	D	D	D	.	E	D	D	D	D	D	D	E	E	E	E	E	E	E	E	D	D	D	E	E	E	E	E
DE069	D	D	D	D	D	D	D	D	D	E	D	D	D	D	D	D	D	D	D	D	D	D	D	D	D	D	D	D	D	D	D	D	D	D	D	D	D	D	D	D	D	D	D	D	D	D	D	D	D
DE070	E	D	D	D	D	D	E	E	E	E	E	D	D	D	E	E	E	E	E	E	E	E	E	D	D	D	D	D	D	D	D	D	D	D	D	D	D	D	E	E	E	D	D	D	D	D	D	D	D
DE071	E	D	D	D	D	D	D	D	D	D	D	D	D	D	D	D	D	D	E	E	.	E	E	D	D	D	E	E	E	E	E	E	E	D	D	D	D	D	D	D	D	D	D	D	E	E	E	E	E
DE072	E	E	E	E	E	E	E	E	E	E	D	D	D	D	D	D	D	D	D	D	D	D	D	D	D	D	E	E	E	E	E	E	E	E	E	E	E	E	D	D	D	E	E	E	E	E	E	E	E
DE073	E	E	E	E	E	H	E	E	E	E	E	D	D	D	D	D	D	D	D	D	D	D	D	D	D	D	D	E	E	E	E	E	E	E	E	E	E	E	E	E	E	D	D	D	D	D	D	D	D
DE074	D	E	D	D	D	D	D	D	D	D	D	D	D	D	D	E	E	E	E	E	E	E	E	H	E	E	D	E	E	E	E	E	E	E	E	E	D	D	E	E	E	D	D	D	E	E	E	E	E
DE075	E	E	E	E	E	H	D	D	D	D	D	E	E	E	E	D	D	D	D	D	D	E	E	H	E	E	E	E	E	E	E	E	E	E	E	E	E	E	D	D	D	D	D	D	D	D	D	E	E
DE076	E	E	E	E	E	E	E	E	E	E	D	D	D	D	D	E	E	D	E	E	D	D	D	D	D	D	D	D	D	D	D	D	D	D	D	D	D	E	D	E	E	E	E	E	E	D	E	E	E
DE077	D	D	D	D	D	D	D	D	D	D	D	D	D	D	D	E	E	E	E	E	E	E	E	E	E	E	E	D	D	D	D	D	D	D	D	D	E	E	E	E	D	D	D	D	D	D	D	D	D
DE078	D	D	D	D	D	D	D	D	D	E	E	E	E	E	E	E	E	E	E	E	E	E	E	E	E	E	E	E	E	E	E	E	E	E	E	E	E	E	.	E	E	E	E	E	E	E	E	E	E
DE079	E	E	E	E	E	E	E	E	E	E	E	E	E	E	E	D	D	D	D	D	D	D	D	D	D	D	D	E	E	E	E	E	E	E	E	E	E	E	E	E	E	D	D	D	D	D	D	D	D
DE080	D	D	D	D	D	D	D	D	D	D	D	D	D	D	D	D	D	D	E	E	E	E	E	E	E	E	E	D	D	D	D	D	D	D	D	D	E	E	E	E	E	E	E	E	E	E	D	D	D
DE081	E	E	D	D	D	D	D	D	D	D	D	D	D	D	E	E	E	E	D	D	D	D	D	D	D	D	D	D	D	D	D	E	E	E	E	E	E	E	D	D	D	D	D	D	D	D	D	E	E
DE085	E	E	E	D	D	D	H	H	D	D	E	E	E	E	E	E	E	E	E	E	E	E	E	E	E	E	E	E	E	E	E	E	E	E	D	D	D	D	D	D	D	E	E	E	D	D	D	D	D
DE086	E	E	E	E	E	H	E	E	E	E	E	E	E	E	E	D	D	D	D	D	D	D	D	.	D	D	E	D	D	H	H	E	H	D	D	D	D	D	E	H	E	D	D	D	E	E	E	E	E
DE088	D	D	D	D	D	D	D	D	D	D	D	D	D	D	D	D	D	D	D	D	D	D	D	H	E	D	D	E	E	E	E	E	E	E	E	E	E	E	E	E	E	E	E	E	E	E	E	E	E
DE089	E	E	E	E	E	E	E	E	E	E	E	E	E	E	E	E	E	E	E	E	E	E	E	H	E	E	E	E	E	E	E	E	E	E	E	E	E	E	E	E	D	E	E	E	E	E	E	E	E
DE090	D	D	D	D	D	D	D	D	D	D	D	D	D	D	D	E	E	E	E	E	E	D	D	H	E	E	E	E	E	E	E	E	E	E	E	E	E	E	E	E	E	E	E	E	E	E	E	D	D
DE091	D	D	D	D	D	D	D	D	D	D	D	D	D	D	D	D	D	D	D	D	D	D	D	D	D	D	D	D	D	D	D	D	D	D	D	D	D	D	D	D	D	E	E	E	E	E	E	D	D
DE092	E	D	D	D	D	D	D	D	E	E	D	D	D	D	D	D	D	D	D	D	D	D	D	D	D	D	D	D	D	D	D	D	E	E	D	D	D	D	D	D	D	D	D	D	D	D	D	D	D
DE093	E	E	E	E	E	E	E	E	E	E	E	E	E	E	E	E	E	E	E	E	E	D	D	D	D	D	D	E	E	E	E	E	D	D	D	D	D	D	D	D	D	E	E	E	E	E	E	E	E
DE094	D	D	D	D	D	D	D	D	D	D	D	D	D	D	D	D	D	D	D	D	D	D	D	D	D	D	D	D	E	E	E	E	E	E	E	E	E	E	E	E	E	E	E	E	D	D	D	D	D
DE095	D	D	D	D	D	D	H	H	E	D	E	D	D	D	D	E	E	E	D	D	D	D	D	D	D	D	D	E	E	E	E	E	E	D	E	E	E	E	D	D	D	E	E	E	E	E	E	E	E
DE096	E	E	E	E	E	E	E	E	D	E	E	E	E	E	E	E	E	E	E	E	D	D	D	D	D	D	D	D	D	D	D	D	D	D	D	D	D	D	D	D	D	D	D	D	D	D	D	D	D
DE097	E	D	D	D	D	D	D	D	D	E	E	E	E	E	E	E	E	E	E	E	E	E	E	H	E	E	E	E	D	D	H	E	H	D	D	D	D	D	D	E	E	E	E	E	E	E	E	E	E
DE098	E	E	D	D	D	D	D	D	D	D	E	E	E	D	E	E	E	E	E	E	E	E	E	E	E	E	E	E	D	D	D	D	E	E	E	E	E	E	E	E	D	D	D	D	D	E	E	E	E
DE099	D	D	D	D	D	D	D	E	E	E	E	E	E	E	E	D	D	D	E	D	D	D	D	D	D	D	D	E	E	E	E	E	E	E	E	E	E	E	E	E	E	D	D	D	D	D	D	D	D
DE100	D	E	E	E	E	E	E	E	E	E	D	D	D	D	D	D	D	D	D	D	D	D	D	E	E	.	D	E	E	E	E	E	E	E	E	E	E	E	E	E	E	E	E	E	E	E	E	E	E
DE101	D	D	D	H	H	D	H	H	E	E	D	D	E	E	E	.	H	D	D	H	H	D	D	E	E	.	E	D	D	D	D	D	D	D	D	D	D	D	D	D	D	E	E	E	E	E	E	E	E
DE102	E	E	D	D	D	D	D	D	D	D	D	D	D	D	D	E	E	E	E	E	E	E	E	E	E	.	D	E	E	E	E	E	E	E	E	E	E	E	E	D	D	E	E	E	D	D	D	D	D
DE103	E	E	E	D	D	D	D	D	D	D	D	E	E	E	E	D	D	D	D	D	D	D	D	E	E	E	E	E	D	D	.	D	D	E	E	E	D	D	D	D	D	D	D	D	D	D	D	D	D
DE104	D	D	D	D	D	D	D	D	D	D	D	D	E	E	E	E	E	E	E	E	E	E	E	E	E	E	E	D	D	D	D	D	D	D	D	D	D	D	D	D	D	E	E	E	E	E	E	E	E
DE105	E	D	D	D	D	D	D	D	D	D	E	E	E	E	D	E	E	E	D	E	E	E	E	D	D	D	D	D	D	D	D	D	D	E	E	E	E	E	E	E	E	E	E	E	E	E	D	D	D
DE106	D	D	D	D	D	D	D	D	D	D	E	E	E	E	E	D	D	D	D	D	D	D	D	D	D	E	E	D	D	D	D	D	D	E	E	E	E	E	E	E	E	D	D	D	E	E	E	E	E
DE107	E	E	E	D	D	D	E	E	E	E	E	E	E	E	D	E	E	E	E	E	E	E	E	D	D	D	E	E	E	E	E	E	E	D	D	D	D	D	E	E	E	E	E	E	E	E	E	E	E
DE108	D	D	D	D	D	D	E	E	D	D	D	D	D	D	D	E	E	E	E	E	E	E	E	D	D	D	D	D	D	D	D	D	D	D	D	D	D	D	D	D	D	E	E	E	E	E	E	E	E
DE109	E	E	E	E	E	E	E	E	E	E	E	E	E	E	E	D	D	D	D	D	D	D	D	E	E	E	D	E	E	E	E	E	D	D	D	D	D	D	D	D	D	E	E	E	E	D	D	D	D
DE111	D	D	D	D	D	D	D	D	D	D	E	E	E	E	E	D	D	D	D	D	D	E	E	D	D	D	D	D	D	D	D	D	E	E	E	E	E	E	E	E	E	E	E	E	E	D	E	E	E
DE112	E	D	D	D	D	D	D	D	D	D	D	E	E	E	E	D	D	D	D	D	D	D	D	D	D	D	D	D	D	D	D	D	E	E	D	D	D	D	D	D	D	E	E	E	E	D	D	D	D
DE113	D	D	D	D	D	D	D	D	D	D	E	E	E	E	E	E	E	E	E	E	E	E	E	D	D	D	D	D	D	D	E	D	E	E	E	E	E	E	E	E	E	.	E	E	D	D	D	D	D
DE114	D	D	D	D	D	D	D	D	D	D	D	E	E	E	E	D	D	D	D	D	D	D	D	D	D	E	D	D	D	D	D	D	D	D	D	D	D	D	D	D	D	E	E	E	E	E	E	E	E
DE115	D	D	D	D	D	D	D	D	H	H	E	E	E	E	E	E	E	E	D	D	D	D	D	D	D	D	E	E	E	E	E	E	E	E	E	E	E	E	E	E	E	D	D	D	D	D	D	D	D
DE116	D	D	H	H	D	D	D	D	H	H	H	E	E	E	E	E	E	E	.	H	H	H	E	D	D	D	E	D	H	E	H	.	D	D	E	D	E	E	E	E	E	D	D	D	D	H	E	H	E
DE117	E	H	E	D	D	D	D	D	E	E	.	E	E	E	E	.	D	D	D	E	E	E	E	D	D	D	D	.	E	E	E	E	D	E	E	H	E	E	E	E	E	E	E	H	E	E	E	E	E
DE118	E	D	D	D	D	D	D	D	D	D	H	E	D	D	D	E	E	E	D	E	E	E	E	D	D	E	H	D	H	E	H	D	D	D	D	D	D	D	H	D	D	E	E	E	D	D	D	D	D
DE119	E	E	E	E	E	E	D	D	D	D	D	D	D	D	D	E	E	E	E	E	E	E	E	H	E	E	E	D	D	D	D	D	D	E	E	E	E	E	E	E	E	D	D	D	D	D	D	D	D
DE120	D	D	D	D	D	D	D	D	D	D	E	E	E	E	D	E	E	E	E	E	E	E	E	D	D	D	D	E	E	E	E	E	E	E	E	E	E	E	E	D	D	D	D	D	D	D	D	D	D
DE121	D	E	E	H	H	D	D	D	D	D	D	D	D	D	D	E	E	E	D	D	D	D	D	D	D	D	D	D	D	D	D	D	D	D	D	D	D	D	E	E	E	D	D	D	D	D	D	D	D
DE122	D	D	D	D	D	D	D	D	D	D	D	D	D	D	D	D	D	D	D	D	D	D	D	H	E	E	E	D	E	E	E	E	E	E	E	E	E	E	E	E	E	E	E	E	E	E	D	D	D
DE123	D	D	D	D	D	D	D	D	D	D	E	E	E	E	E	D	D	D	D	D	D	D	D	D	D	D	D	E	E	E	E	E	D	D	D	D	D	D	D	D	D	E	E	E	E	E	E	E	E
DE124	D	D	E	E	E	E	E	E	E	E	E	E	E	E	E	E	E	E	E	E	H	E	E	E	.	E	E	D	D	D	D	D	D	E	E	E	E	E	E	D	D	D	D	D	D	D	D	D	D
DE125	E	D	D	D	D	D	D	D	E	E	E	E	E	E	E	E	E	E	E	E	E	E	E	E	E	E	E	E	E	E	E	E	E	E	E	E	E	E	E	D	D	E	E	E	E	E	E	E	E
DE126	D	E	E	E	E	E	D	D	D	D	E	E	E	E	E	E	E	E	E	E	E	E	E	E	E	E	D	E	E	E	E	E	E	E	E	E	E	E	E	E	.	E	E	E	E	E	E	E	E
DE127	H	H	D	E	D	D	D	D	E	E	E	E	E	E	E	D	D	D	D	D	D	E	E	E	E	E	E	D	D	D	D	D	D	E	E	E	E	E	E	E	E	E	E	E	E	E	E	E	E
DE128	D	D	H	D	D	D	D	D	D	D	E	E	E	E	E	D	D	D	D	D	D	D	D	D	D	D	D	D	D	D	D	D	D	D	D	D	E	E	.	D	D	D	D	D	D	D	D	D	D
DE129	D	E	E	E	E	E	E	E	E	E	E	E	E	E	D	E	E	E	E	E	E	E	E	E	E	E	E	D	D	D	D	D	D	D	D	D	D	D	D	D	D	D	D	D	E	E	E	D	D
DE130	D	D	D	D	D	D	E	E	E	E	E	E	E	E	E	D	D	D	E	E	E	E	E	D	D	D	D	E	E	E	E	E	E	E	E	E	E	E	E	D	D	D	D	D	D	D	D	D	D
DE131	D	D	D	D	D	D	D	D	D	D	D	E	E	E	E	D	D	D	E	E	E	D	D	D	D	D	E	E	E	D	D	D	D	E	E	E	E	E	E	E	E	E	E	E	D	D	D	D	D
DE132	E	E	E	E	E	E	E	E	D	D	E	E	E	E	E	E	E	E	E	E	E	D	D	D	D	D	D	E	E	E	E	E	E	D	D	D	D	D	D	D	D	E	E	E	E	E	E	E	E
DE133	E	E	E	E	E	E	E	E	E	E	E	E	E	E	E	E	E	E	E	E	E	E	E	E	E	E	E	D	E	E	E	E	E	E	E	E	E	E	E	E	E	D	D	D	D	D	D	D	D
DE134	D	D	D	D	D	D	D	D	E	E	E	E	E	E	E	E	E	E	E	E	E	E	E	E	E	D	D	D	E	E	E	E	.	D	D	D	D	D	D	D	D	D	D	D	E	E	E	E	E
DE135	D	D	D	D	D	D	D	D	D	D	D	D	D	D	D	D	D	D	D	D	D	E	E	E	E	E	E	D	D	D	D	D	D	D	D	D	D	D	E	E	E	E	E	E	.	E	E	E	E
DE136	D	D	D	D	D	D	D	D	D	D	E	E	E	E	E	D	D	D	D	D	.	D	D	D	D	D	D	D	D	D	E	E	E	E	E	E	E	E	E	E	E	D	D	D	D	D	D	D	D
DE137	D	D	D	E	.	E	D	D	D	D	D	D	D	D	D	E	E	E	E	E	E	E	E	E	E	E	E	D	D	D	D	D	E	E	E	E	E	E	E	E	E	E	E	E	E	E	E	E	E
DE138	D	D	D	D	D	D	D	D	E	E	E	E	E	E	E	E	E	E	E	E	E	E	E	E	E	E	E	E	D	D	D	D	D	D	D	D	D	D	D	D	D	E	E	E	D	D	D	.	D
DE139	E	E	E	E	E	E	E	E	D	D	D	D	D	D	D	D	D	D	D	D	D	D	D	D	D	D	D	D	D	D	D	D	D	D	D	D	D	D	D	D	E	E	E	E	E	E	E	E	E
DE140	D	D	D	D	D	D	D	D	D	D	H	D	D	D	H	D	D	D	E	E	E	E	E	E	E	E	E	D	D	D	D	D	D	E	E	E	E	E	E	E	E	E	E	E	D	D	D	D	D
DE141	D	D	D	D	D	D	D	D	E	E	D	D	D	D	E	E	E	E	E	E	E	E	E	D	D	D	D	D	D	E	E	E	D	D	D	D	D	D	E	E	E	D	D	D	D	D	D	D	D
DE142	E	E	D	D	D	D	D	D	E	D	D	D	D	D	D	E	E	D	D	D	D	D	D	D	D	D	D	D	H	E	H	D	D	D	D	D	D	D	D	D	D	E	E	E	E	D	D	D	D
DE143	D	D	D	D	D	D	D	D	E	E	E	E	E	H	H	E	H	E	E	E	E	E	E	E	E	E	D	E	E	E	E	E	E	H	E	D	D	E	E	E	E	E	E	E	E	E	E	H	E
DE144	D	D	D	D	D	D	D	D	D	D	D	D	D	D	D	E	E	E	E	E	E	E	E	E	E	E	E	D	D	D	D	D	D	D	D	D	D	D	E	E	E	D	D	D	D	D	D	D	D
DE145	D	D	D	D	D	D	D	D	D	D	D	D	D	D	D	D	D	D	D	D	D	D	D	E	E	E	E	D	D	D	D	D	E	D	D	D	D	D	D	D	D	E	E	E	E	E	E	E	E
DE146	D	D	D	D	D	D	D	D	D	D	E	D	D	D	D	D	D	D	D	D	D	D	D	D	D	E	E	D	D	D	D	D	D	D	D	D	D	D	D	D	D	E	E	E	D	D	D	D	D
DE147	D	D	D	D	D	D	D	D	D	D	D	D	D	D	D	E	E	E	D	D	E	D	D	D	D	D	D	D	D	D	D	D	D	E	E	E	H	H	D	D	D	D	D	D	D	D	D	D	D
DE148	D	D	D	D	D	D	D	D	E	E	E	E	E	E	E	E	E	E	E	E	E	E	E	D	D	E	E	E	E	E	E	E	D	D	D	D	D	D	D	D	D	.	D	D	D	D	D	D	D
DE149	E	E	E	E	E	E	D	D	E	E	D	D	D	D	D	E	E	E	E	E	E	D	D	H	E	E	E	E	E	E	E	E	E	E	E	E	E	E	E	D	D	D	D	D	D	D	D	D	D
DE150	E	E	H	D	D	D	D	D	D	D	D	D	D	D	H	E	E	E	D	D	D	D	D	D	D	D	E	D	H	D	D	D	D	E	E	E	D	D	D	E	E	E	E	E	E	E	E	E	E
DE152	E	E	E	D	D	D	D	D	D	D	H	E	H	H	E	D	D	D	D	D	D	E	E	D	D	D	E	D	H	E	E	E	E	E	E	E	D	D	D	H	D	D	D	D	D	D	D	D	D
DE153	E	E	E	E	E	E	D	D	D	D	D	D	D	D	D	D	D	D	E	E	E	E	E	E	E	E	E	E	E	E	E	E	E	E	E	E	E	E	E	E	E	D	D	D	D	D	D	D	D
DE154	D	E	E	E	E	E	E	E	E	E	E	E	E	E	E	E	E	E	D	D	D	D	D	D	D	D	D	D	H	D	D	E	D	E	E	E	E	E	E	E	E	D	D	D	D	D	D	D	D
DE155	D	D	D	D	D	D	D	D	E	E	E	E	E	E	E	E	E	E	E	E	D	D	D	D	D	D	D	D	D	.	D	D	D	D	D	D	D	D	D	D	D	D	D	D	D	D	D	D	D
DE156	E	E	E	E	E	E	E	E	E	E	E	D	D	D	D	D	D	D	D	D	D	D	D	D	D	E	E	D	D	D	D	D	D	D	D	D	D	D	D	D	D	D	D	D	E	E	E	E	E
DE157	D	D	D	D	D	D	D	D	D	D	D	D	D	D	D	.	E	E	D	D	D	D	D	D	D	D	D	D	D	E	E	E	E	E	E	E	D	D	D	E	E	D	D	D	D	D	D	D	D
DE158	D	D	D	D	D	D	D	D	D	D	D	D	D	D	D	D	D	D	D	D	D	D	D	D	D	D	D	E	E	E	E	E	E	E	E	E	E	E	E	E	E	E	E	E	E	E	E	E	E
DE159	E	E	E	E	E	E	E	E	D	D	D	E	E	E	H	E	E	E	E	E	E	E	E	H	E	D	D	E	E	E	E	E	E	E	E	E	E	E	E	E	E	D	D	D	D	D	D	E	E
DE160	D	D	D	D	D	D	D	D	D	D	D	D	D	D	D	D	D	D	D	D	D	D	D	D	D	D	D	E	E	D	E	E	E	D	D	D	D	D	D	D	D	D	D	D	D	D	D	D	D
DE161	D	D	D	D	D	D	D	D	D	D	E	E	E	E	E	D	D	D	D	D	D	D	D	D	D	E	E	D	D	E	E	E	E	E	E	E	E	E	E	E	E	E	E	E	D	D	D	D	D
DE162	D	D	D	D	D	D	D	D	D	D	D	D	D	D	D	E	E	E	E	E	E	E	E	E	E	D	D	E	E	E	E	E	E	E	E	E	E	E	E	E	E	E	E	E	E	E	E	E	E
DE163	E	E	E	E	E	E	D	D	D	D	D	D	D	D	D	D	D	D	E	E	E	E	E	E	E	E	E	D	D	D	D	D	E	.	E	E	E	E	D	D	D	D	D	D	D	D	D	D	D
DE164	D	E	E	E	E	E	E	E	E	E	E	D	D	D	D	D	D	D	E	E	E	E	E	E	E	E	E	D	D	D	D	D	D	D	D	D	D	D	D	D	D	H	H	H	E	E	E	E	E
DE165	D	D	D	D	D	D	H	H	E	E	E	D	D	D	D	E	E	E	E	E	E	E	E	D	D	D	D	E	E	E	E	E	E	D	D	D	D	D	E	E	E	D	D	D	D	D	D	D	D
DE166	D	D	D	D	D	D	D	D	D	E	E	E	E	E	D	D	D	D	E	E	E	E	E	E	E	E	E	D	D	D	D	D	D	E	D	D	E	E	E	E	E	E	.	E	E	E	E	E	E
DE167	D	D	D	D	D	D	D	D	D	D	D	D	D	D	D	D	D	D	D	D	E	E	E	E	E	E	D	D	D	D	D	D	D	E	E	E	E	E	E	E	E	D	D	D	E	E	E	E	E
DE168	D	D	D	D	D	D	D	D	D	D	D	D	D	D	D	E	E	E	E	E	E	E	E	E	E	E	D	D	D	D	D	D	D	E	E	E	E	E	E	E	E	E	E	E	E	E	E	E	E
DE169	E	E	E	E	E	E	E	E	E	E	E	E	E	E	E	D	D	D	D	D	E	E	E	E	E	E	E	D	D	E	D	.	D	D	D	D	D	D	D	D	D	E	E	E	E	E	E	E	E
DE170	E	E	E	E	E	E	E	E	E	E	E	E	E	E	E	E	E	E	E	E	E	E	E	D	D	E	D	E	E	E	E	E	D	D	D	D	D	D	D	D	D	E	E	E	E	E	E	E	E
DE173	D	D	D	D	D	D	E	E	E	E	E	E	E	E	D	D	D	D	D	D	D	D	D	D	D	D	E	E	.	E	E	E	E	D	D	D	D	D	D	D	D	E	E	E	D	E	E	E	E
DE174	.	E	E	D	D	D	D	D	D	D	D	D	D	D	D	D	D	D	D	D	D	.	D	E	E	E	E	D	D	D	D	E	E	D	E	E	E	D	D	D	D	E	E	E	D	D	D	D	D
DE175	E	E	D	D	D	D	D	D	D	D	D	D	D	D	D	E	E	E	E	E	E	E	E	D	D	D	D	E	E	E	E	E	E	E	E	E	E	E	E	D	D	E	E	E	E	E	E	E	E
DE176	D	D	D	D	.	D	D	D	D	D	D	D	D	D	E	E	E	E	E	E	E	E	E	E	E	E	E	E	.	E	E	.	E	E	E	E	E	E	D	D	D	E	E	E	E	E	E	E	E
DE178	D	D	D	D	D	D	D	D	D	D	D	D	D	D	E	E	E	E	E	E	D	D	D	D	D	D	D	D	D	D	D	D	D	D	D	D	D	D	D	D	D	E	E	E	E	E	E	E	E
DE179	D	D	D	D	D	D	D	D	D	D	D	D	D	D	D	E	E	D	D	D	D	D	D	D	D	D	D	E	E	E	E	E	E	E	E	E	E	E	D	D	D	D	D	D	D	D	D	E	E
DE180	D	D	D	D	D	D	D	D	D	D	.	E	E	E	E	E	E	E	E	E	E	E	E	D	D	D	E	E	E	E	E	D	D	E	E	E	D	D	D	D	D	E	E	E	E	D	D	D	D
DE181	D	D	D	D	D	D	E	E	E	E	E	E	E	E	E	E	E	E	E	E	H	D	D	D	D	D	D	E	E	E	E	E	E	E	E	E	E	E	E	E	E	E	E	E	E	E	E	E	E
DE182	D	D	D	D	D	D	D	D	E	E	E	E	E	D	E	E	E	E	E	E	E	E	E	D	D	D	D	E	E	E	E	E	E	E	E	E	E	E	E	E	E	D	D	D	D	D	D	D	D
DE183	E	E	E	D	D	D	D	D	D	D	D	D	D	D	D	E	E	E	E	E	E	E	E	E	E	E	E	E	.	E	E	D	D	D	D	D	D	D	D	D	D	E	E	E	D	D	D	D	D
DE184	D	D	E	E	E	E	E	E	E	E	E	E	E	E	E	E	E	E	E	E	E	D	D	D	D	D	D	D	D	D	D	D	D	D	D	D	D	D	D	D	D	E	E	E	E	E	E	E	E
DE185	H	H	D	H	D	.	D	D	D	D	D	D	D	D	D	D	D	E	D	D	D	D	D	D	D	D	E	E	E	E	D	D	D	D	D	D	D	E	.	D	D	E	E	E	E	E	E	E	E
DE186	D	D	D	D	D	D	D	D	D	D	D	D	D	D	D	D	D	D	D	D	D	D	D	D	D	D	D	D	E	E	E	E	D	E	E	E	E	D	D	D	D	D	D	D	D	D	D	D	D
DE187	E	E	E	E	E	E	D	D	D	D	D	D	D	D	D	E	E	E	E	E	E	E	E	E	E	E	D	D	D	D	D	D	D	D	D	D	D	D	D	E	E	D	D	D	D	D	D	D	D
DE188	E	E	E	E	.	E	E	E	D	E	E	E	E	E	E	E	E	E	D	D	D	D	D	D	D	D	E	E	E	E	E	E	E	E	E	E	E	E	E	E	E	D	D	D	D	.	D	D	D
DE189	E	E	E	E	E	E	E	E	E	E	E	E	E	E	E	E	E	E	E	E	E	D	D	E	E	D	D	D	D	D	D	D	D	E	E	E	E	E	E	E	E	E	E	E	E	E	E	E	E
DE190	E	D	D	D	D	D	D	D	D	D	D	D	D	D	D	E	E	E	E	E	E	E	E	E	E	D	E	D	D	D	D	D	D	D	D	D	D	D	E	E	E	E	E	E	E	E	E	E	E
DE191	D	D	D	D	D	D	E	E	E	E	E	D	D	D	D	E	E	E	E	E	E	D	D	E	E	E	E	D	D	D	D	D	D	D	D	D	D	D	D	D	D	E	E	E	D	D	D	D	D
DE192	E	E	E	E	E	E	D	D	D	D	D	D	D	E	E	D	D	D	D	D	E	E	E	E	E	E	E	E	E	E	E	E	E	D	D	D	D	D	D	D	D	E	E	E	E	E	E	E	E
DE193	E	E	D	D	D	D	D	D	D	D	D	H	H	H	D	D	D	E	E	E	E	E	E	E	E	E	E	D	D	D	D	D	D	D	D	D	D	D	D	D	D	D	D	D	D	D	D	E	E
DE194	E	E	E	D	D	D	D	D	D	E	D	D	D	D	D	E	E	E	E	E	E	E	E	D	D	D	D	E	.	E	E	E	E	E	E	E	D	D	D	D	D	E	E	E	E	D	D	D	D
DE195	D	D	D	D	D	D	D	D	D	D	E	E	E	E	E	E	E	E	E	E	E	E	E	E	E	E	E	D	.	D	D	D	E	E	E	E	E	E	E	E	E	E	E	E	E	E	D	D	D
DE196	H	H	H	E	E	H	E	E	D	D	H	H	H	H	D	E	E	E	E	E	E	E	E	E	E	E	E	E	E	E	E	D	D	D	E	E	E	E	E	E	E	E	E	E	E	E	D	E	E
DE197	D	D	D	D	D	D	D	D	D	D	D	D	D	D	D	D	D	D	D	D	D	D	D	D	D	D	D	D	E	E	E	E	E	E	E	E	E	E	E	E	E	D	D	D	D	D	D	E	E
DE198	D	D	D	D	D	D	D	D	D	D	E	D	.	D	D	D	D	E	E	E	E	E	E	D	D	D	D	D	D	D	D	D	D	E	E	E	E	E	E	E	E	E	E	E	E	E	E	E	E
DE199	D	D	D	D	D	D	D	D	D	E	E	E	E	E	E	E	E	E	D	E	D	D	D	D	D	D	H	E	E	E	E	E	E	D	D	D	D	.	D	D	D	E	E	E	E	E	E	E	E
DE200	D	D	D	D	D	D	E	E	E	E	E	E	E	E	E	D	D	D	D	D	D	E	E	E	E	.	E	E	E	E	E	E	E	E	.	E	E	.	E	E	.	E	E	E	D	D	D	D	D
DE201	D	D	D	D	D	D	D	D	D	E	D	D	D	D	D	E	E	E	E	E	E	E	E	E	.	E	E	H	D	E	E	E	E	E	E	E	E	E	.	D	D	D	D	D	D	D	D	D	D
DE202	E	E	E	E	E	E	E	E	E	E	E	E	E	E	E	E	E	E	E	E	E	E	E	D	D	D	E	E	E	E	E	E	E	E	E	E	E	E	E	E	E	D	D	D	D	D	D	E	E
DE203	D	D	D	D	D	D	D	D	D	D	E	E	E	E	D	E	E	E	E	E	E	E	E	D	D	E	E	D	D	D	D	D	D	D	D	D	D	D	D	D	D	D	D	D	D	D	D	D	D
DE204	D	D	D	D	D	D	D	D	D	D	D	D	D	D	D	E	E	E	E	E	E	D	D	D	D	D	D	E	E	E	.	E	D	D	D	D	D	D	D	D	D	E	E	E	E	E	E	E	E
DE205	D	D	D	D	D	D	D	D	D	D	D	E	E	E	E	D	D	D	D	D	D	D	D	D	D	D	D	E	E	E	.	E	E	E	E	E	D	D	D	D	D	E	E	E	E	E	E	E	E
DE206	E	E	E	E	E	E	D	D	D	D	.	E	E	D	D	E	E	E	E	E	E	D	D	D	D	H	E	D	D	D	D	D	D	E	E	E	E	E	E	E	E	D	D	D	D	D	D	D	D
DE207	E	E	E	E	E	E	D	D	D	D	D	D	D	D	D	E	E	E	E	E	E	E	E	H	E	E	E	D	D	D	D	D	D	D	D	D	D	D	D	D	D	D	D	D	D	D	D	D	D
DE208	D	D	D	D	D	D	D	D	D	D	D	D	D	D	D	D	D	D	E	E	E	D	D	D	D	D	D	E	E	E	E	E	E	E	E	E	E	E	E	E	E	E	E	E	E	E	E	E	E
DE209	D	D	D	D	D	D	D	D	D	D	D	D	D	D	D	D	D	D	E	E	E	D	D	D	D	D	D	E	E	E	E	E	E	E	E	E	E	E	.	H	H	E	E	E	E	E	E	E	E
DE210	D	D	D	D	E	E	D	D	D	E	E	E	E	E	D	D	D	D	D	D	D	D	D	D	D	D	E	E	E	E	E	E	E	E	E	E	E	E	E	D	D	E	E	E	D	D	D	D	D
DE211	E	E	D	D	D	D	D	D	H	H	E	E	E	E	E	E	E	E	E	E	D	D	D	D	D	D	D	E	E	E	E	E	D	D	D	D	D	D	D	D	D	E	E	E	E	E	E	E	E
[truncated: 35 more columns]
